# Supplementary material for: Modeling Alternative Approaches to the Biodiversity Offsetting of Urban Expansion in the Grenoble Area (France): What Is the Role of Spatial Scales in ‘No Net Loss’ of Wetland Area and Function?
Source: MDPI journal article supplement (doi:10.3390/su13115951), 2021-05-25

# Supplementary Material 4 – Exhaustive results from the three automated biodiversity offsetting scenarios and the supplementary sensitivity analysis (at the watershed and subwatershed levels)

For each double graph related to a scenario or a supplementary analysis, the ecological value and area are given for all the subwatersheds together (left side) and at the subwatershed level (right side). The script to create the following figures is available in Supplementary material 3 (section C).

## 1. Exhaustive results of the three automated biodiversity offsetting scenarios

### 1.1 Results for the old way scenario (priority given to ecological corridors, with best agricultural lands, with permanent grassland and hedgerows)

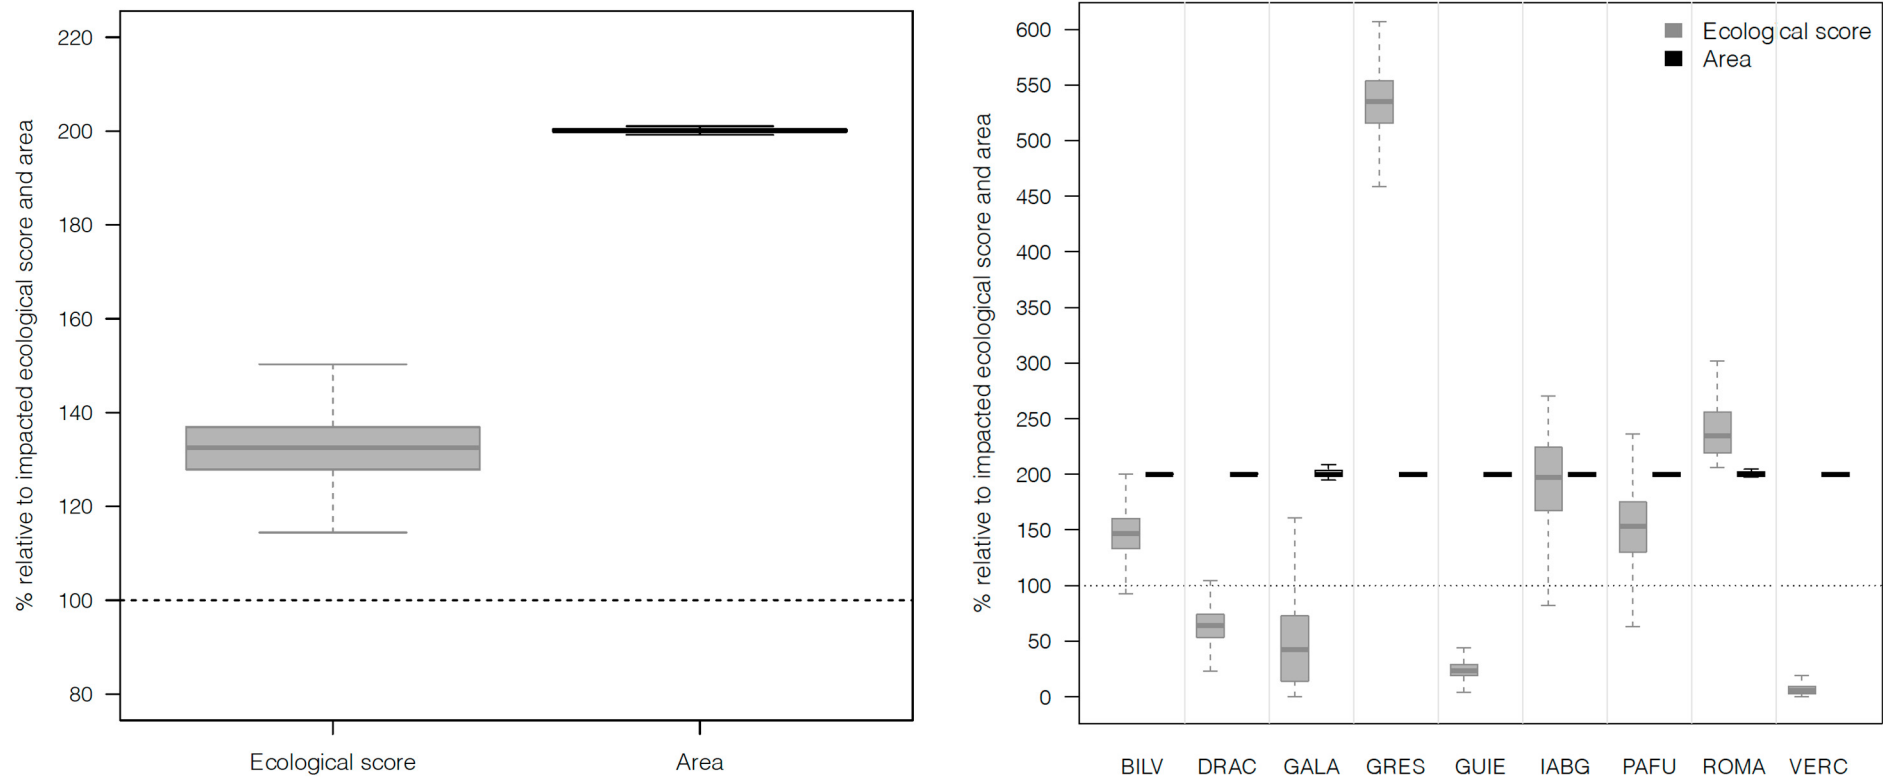

1.2 Results for the local river basin plan scenario (priority given to ecological corridors, with best agricultural lands, without permanent grassland and hedgerows)

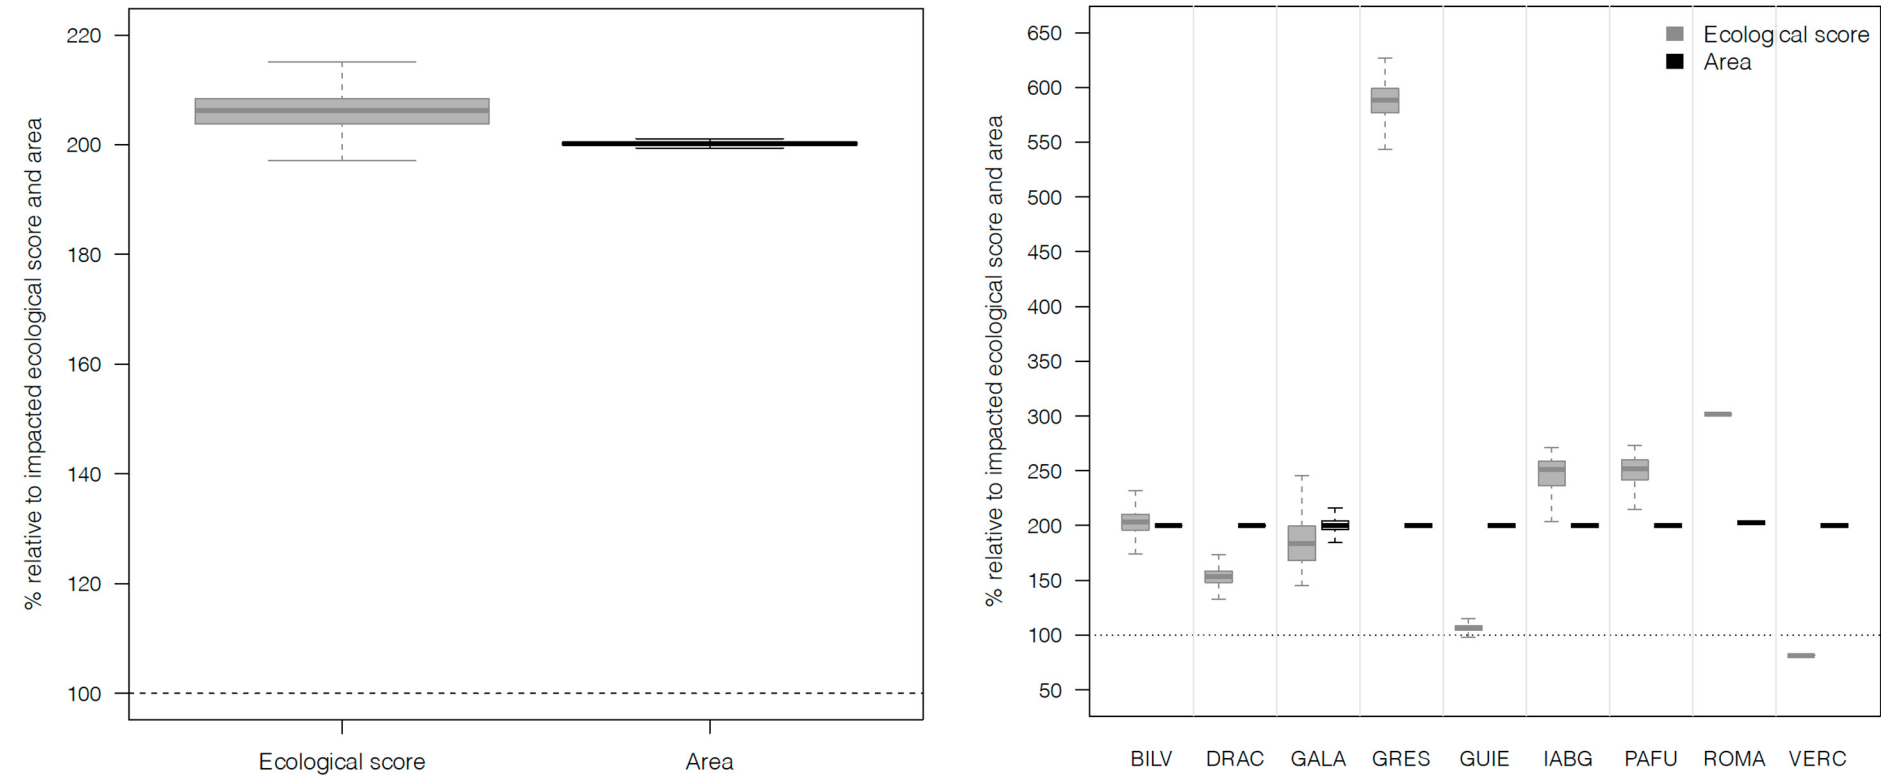

1.3 Results for the prospective scenario (priority given to ecological corridors, with best agricultural lands, without permanent grassland and hedgerows)

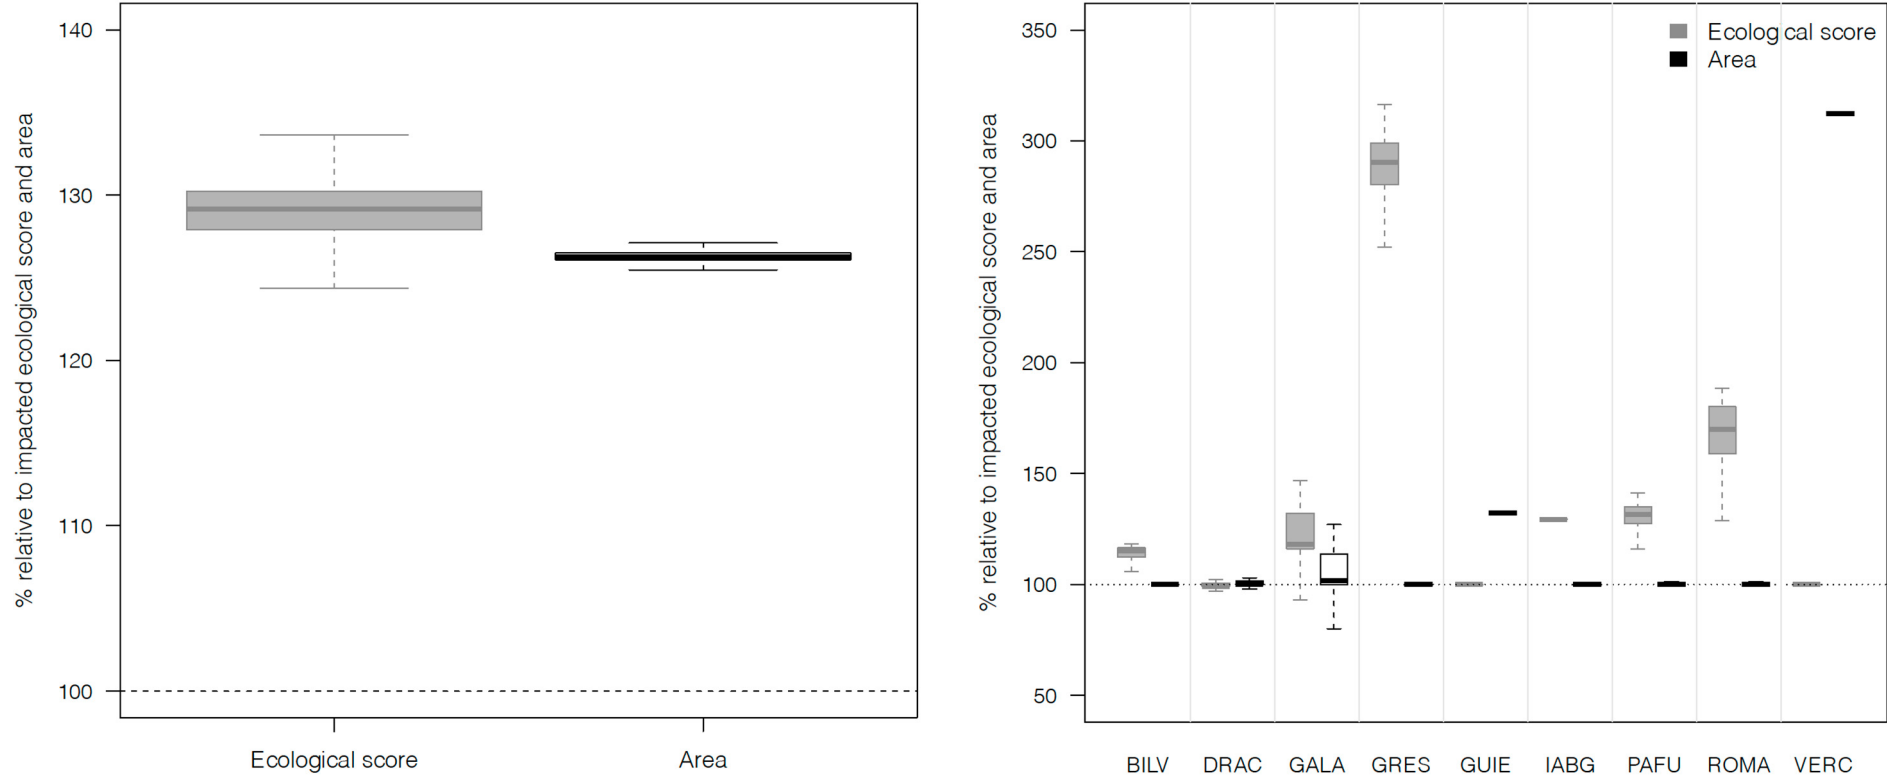

2 Exhaustive results of the supplementary sensitivity analysis of the priority given to offsetting measures located in ecological corridors

2.1 Results for the old way scenario (no priority given to ecological corridors, with best agricultural lands, with permanent grassland and hedgerows)

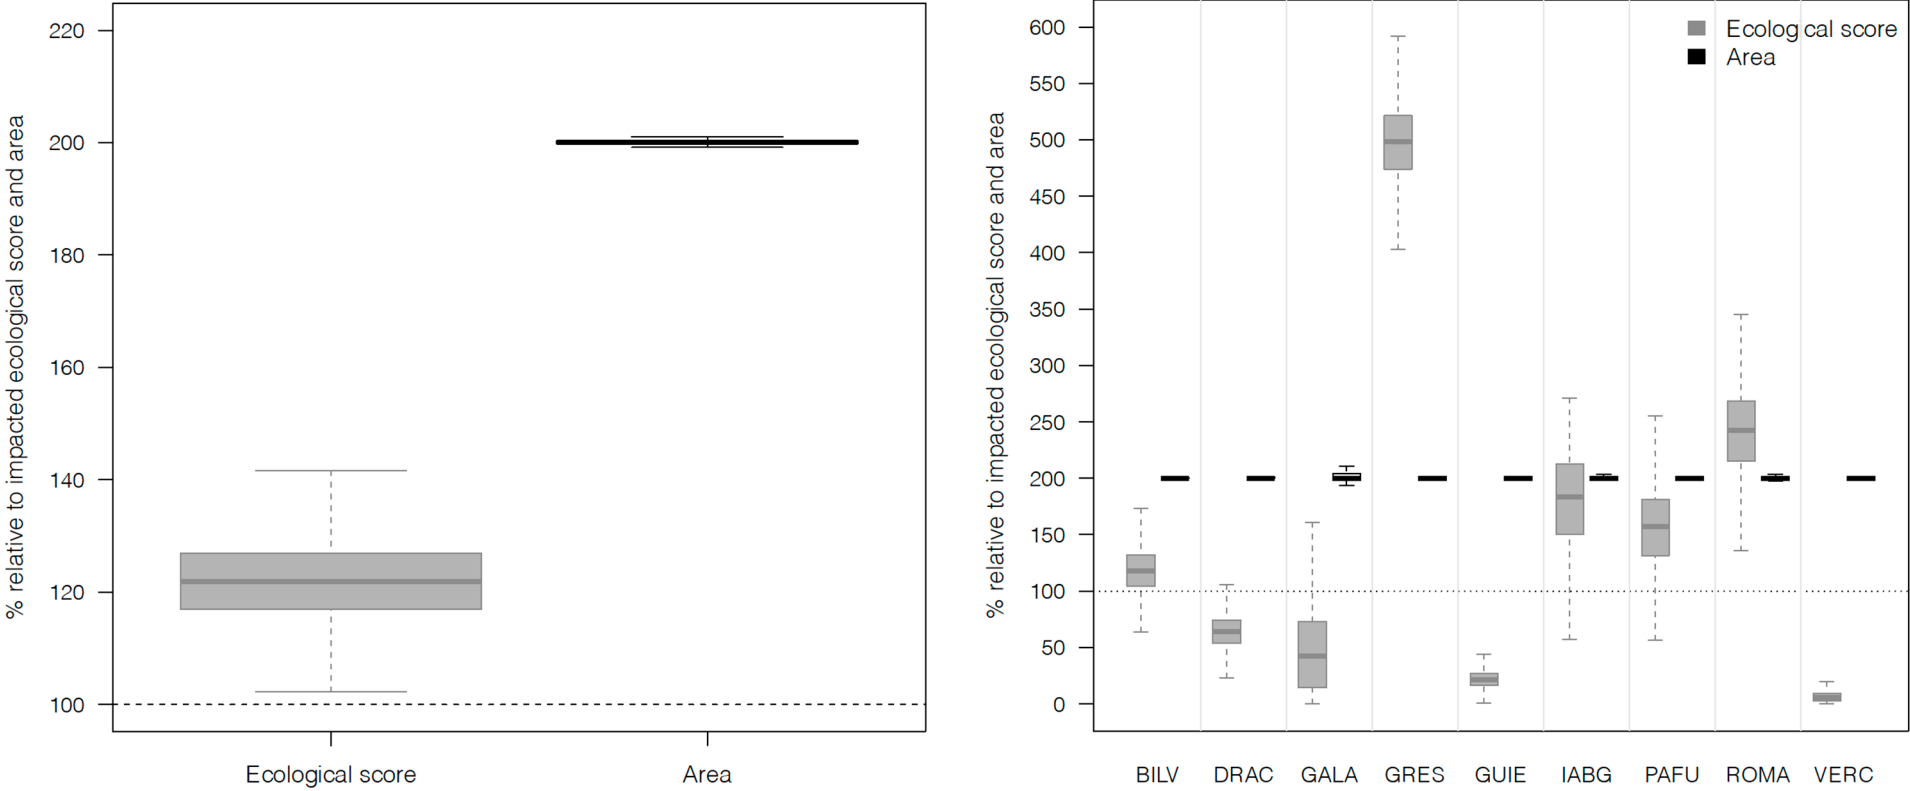

2.2 Results for the local river basin plan scenario (no priority given to ecological corridors, with best agricultural lands, without permanent grassland and hedgerows)

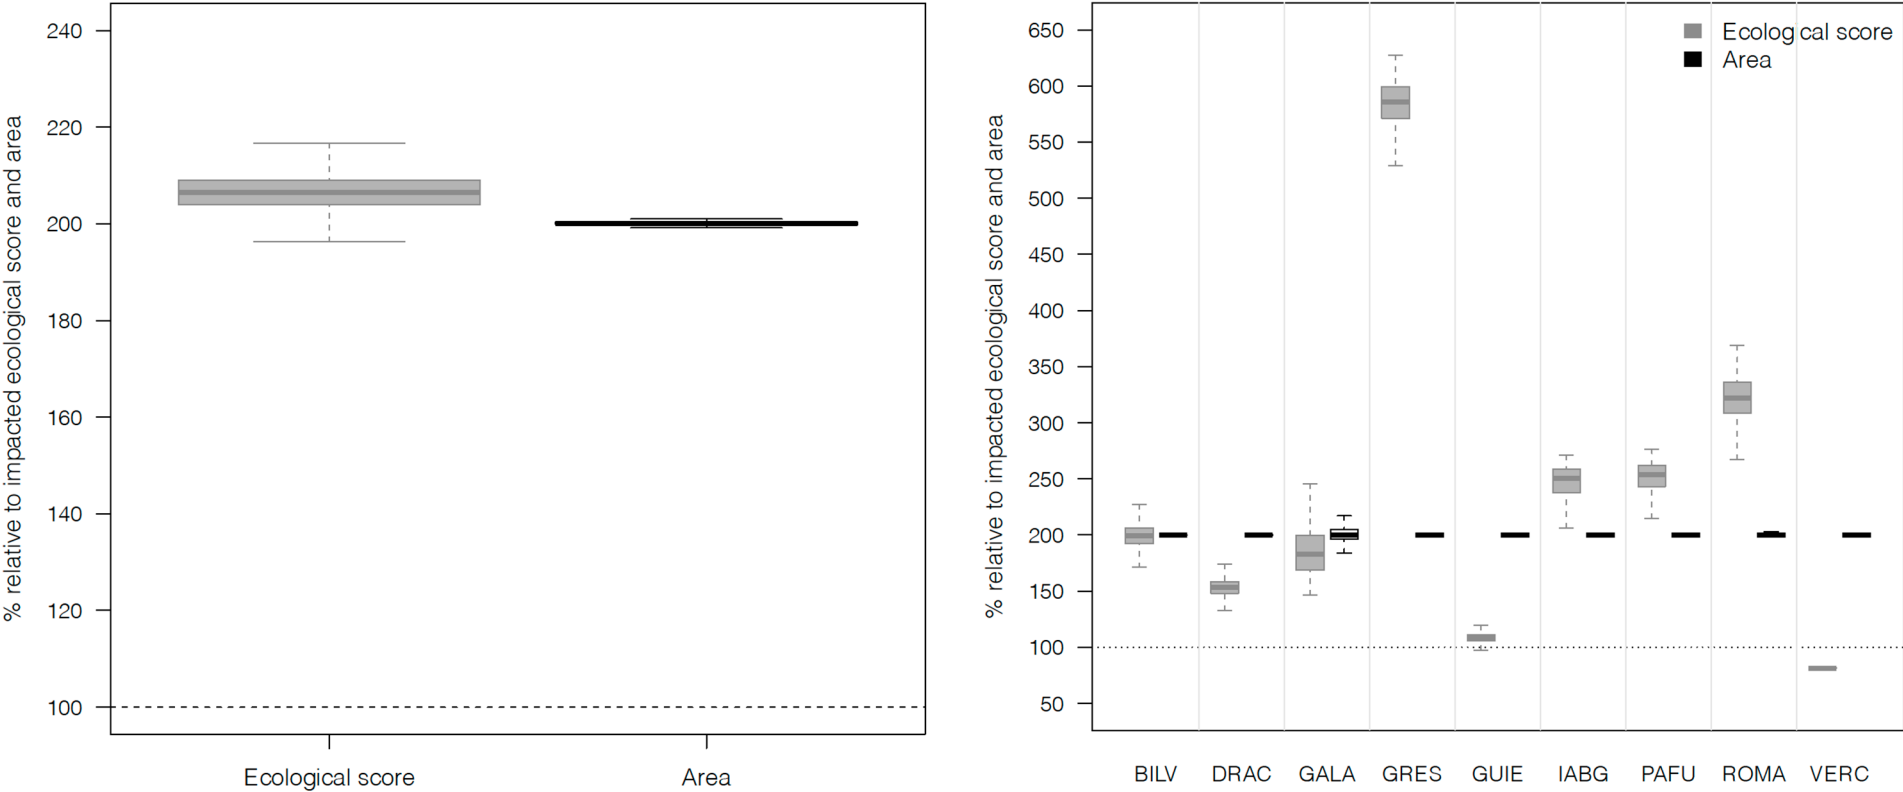

2.3 Results for the prospective scenario (no priority given to ecological corridors, with best agricultural lands, without permanent grassland and hedgerows)

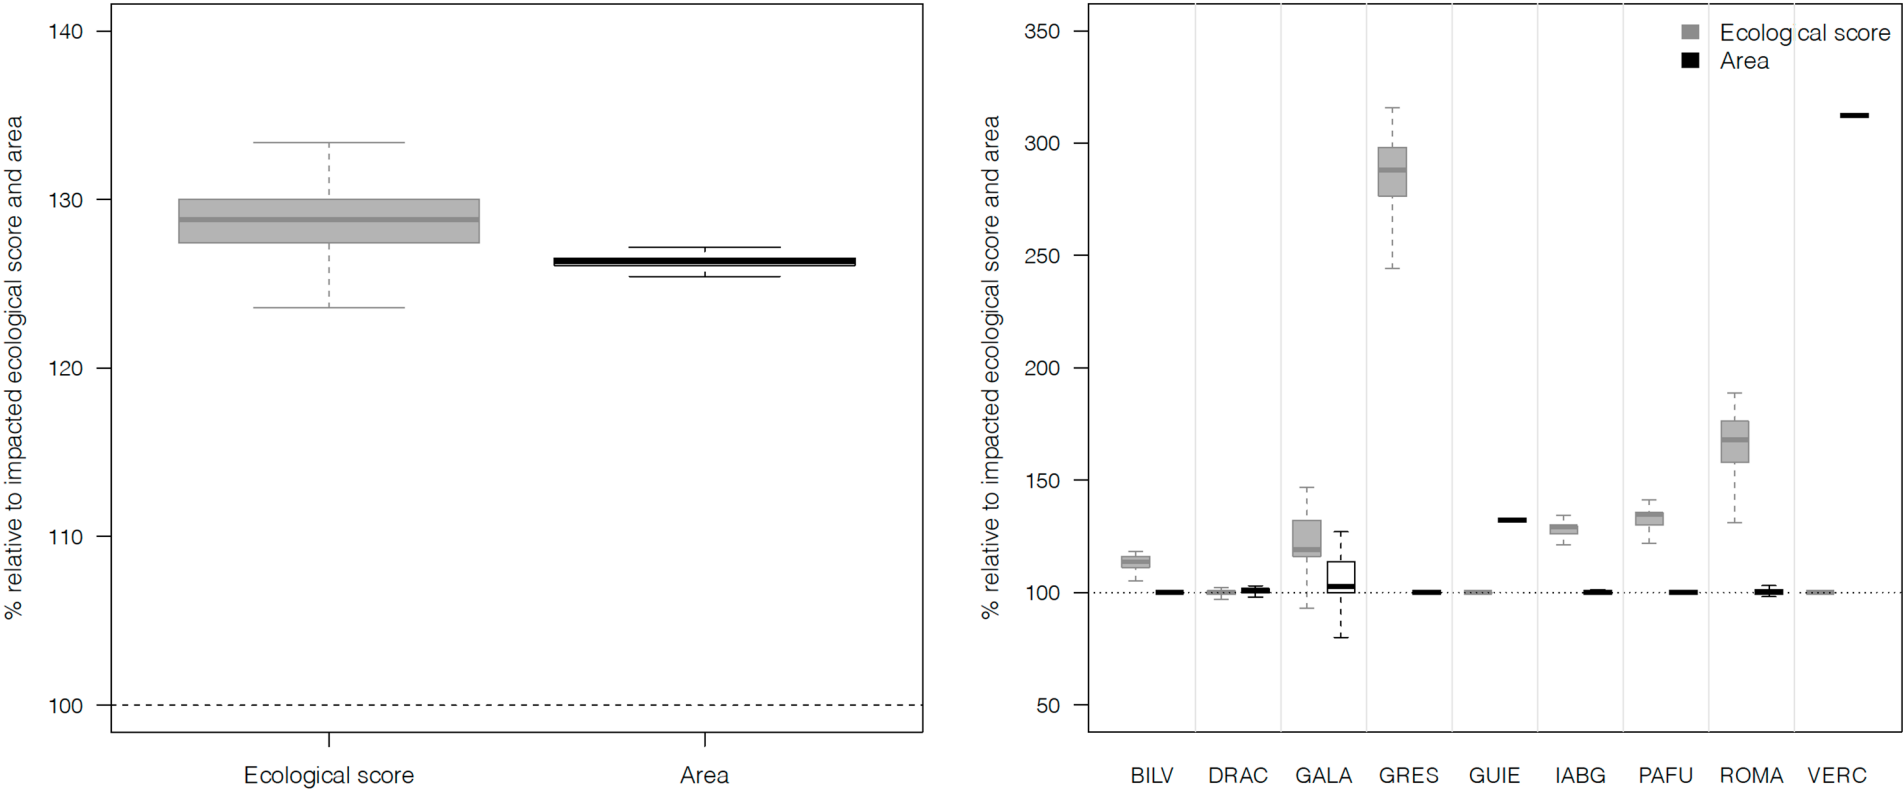

**3 Exhaustive results of the supplementary sensitivity analysis of the removal of parcels with no grassland (best agricultural land) from the possible offsetting parcels**

*3.1 Results for the old way scenario (priority given to ecological corridors, without best agricultural land, with permanent grassland and hedgerows)*

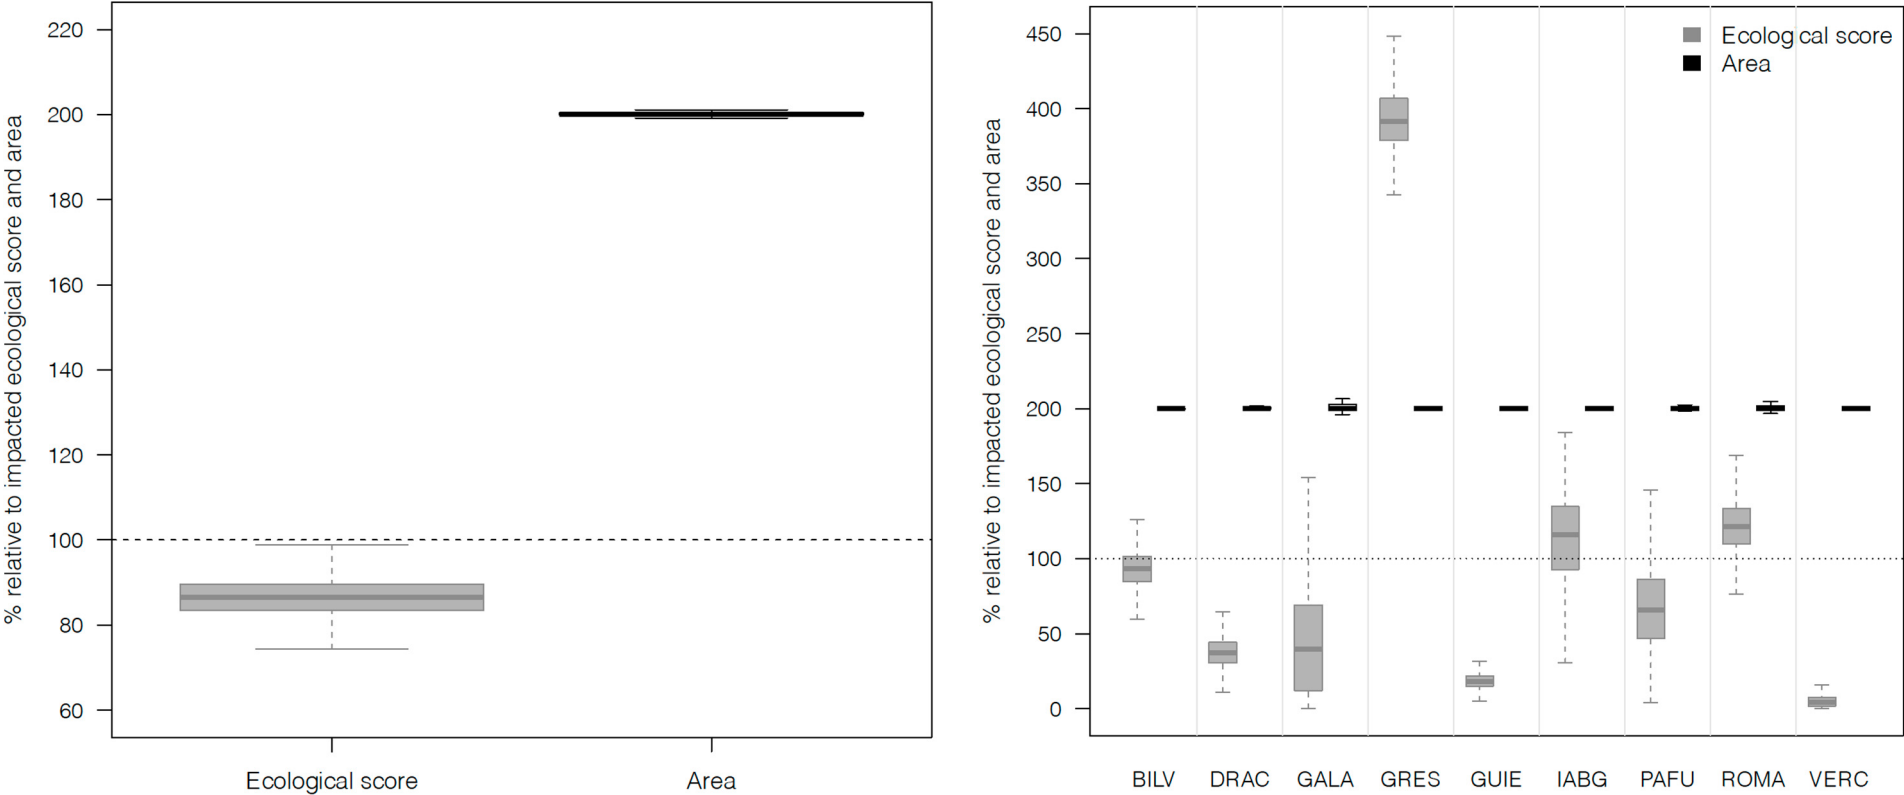

3.2 Results for the local river basin plan scenario (priority given to ecological corridors, without best agricultural lands, without permanent grassland and hedgerows)

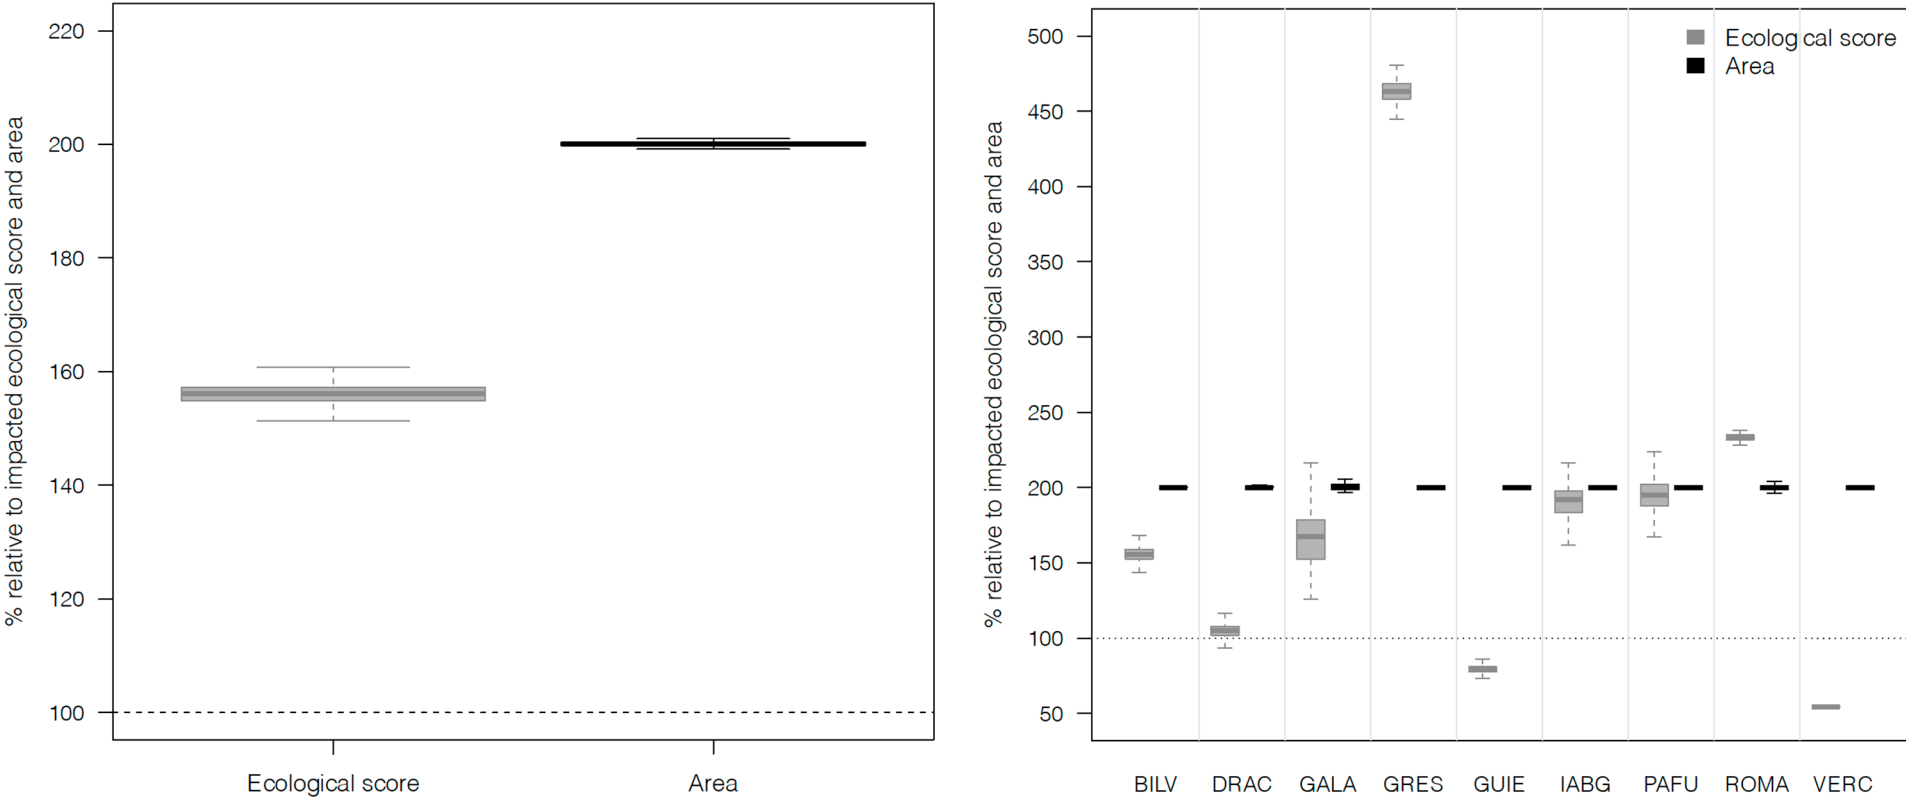

3.3 Results for the prospective scenario (priority given to ecological corridors, without best agricultural lands, without permanent grassland and hedgerows)

Please note that the % relative to impacted area for the VERC subwatershed exceeds the scale of the figure (500%), including it would have made the rest of the figure unreadable.

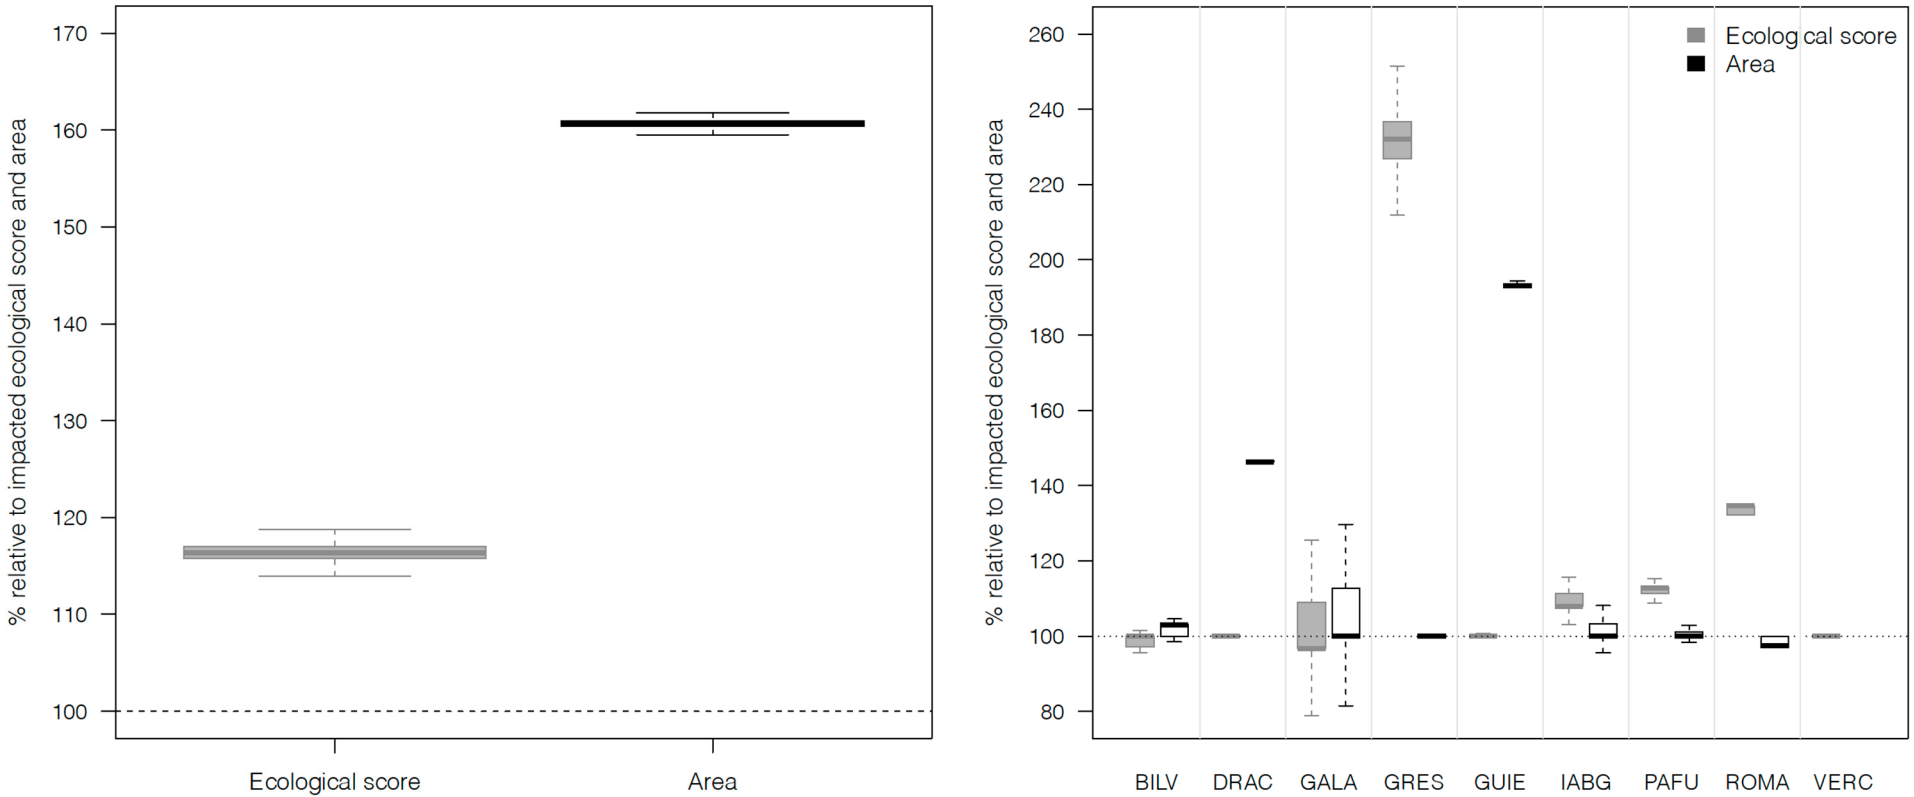

Supplement: s1 [file s1 › Supplementary material 4.pdf]
