# Supplementary material for: Modeling Alternative Approaches to the Biodiversity Offsetting of Urban Expansion in the Grenoble Area (France): What Is the Role of Spatial Scales in ‘No Net Loss’ of Wetland Area and Function?
Source: MDPI journal article supplement (doi:10.3390/su13115951), 2021-05-25
Supplement: s1 [file s1]

Archive with 4 entries (4 files):
- Supplementary material 1.pdf
- Supplementary material 2.pdf
- Supplementary material 3.pdf
- Supplementary material 4.pdf
