# Supplementary material for: Modeling Alternative Approaches to the Biodiversity Offsetting of Urban Expansion in the Grenoble Area (France): What Is the Role of Spatial Scales in ‘No Net Loss’ of Wetland Area and Function?
Source: MDPI journal article supplement (doi:10.3390/su13115951), 2021-05-25
Supplement: s1 [file s1 › Supplementary material 1.pdf]

## Supplementary Material 1 – Scoring systems for agricultural areas linked to two altitudinal zones

### 1.1 – Zones of intensive agriculture: Bièvre Valloire, Voironnais, Grésivaudan < 1,000 m, Southern Grésivaudan < 1,000 m, Grenoble agglomeration

| Agricultural practice                                         | Ecological score /ha<br>Score from 1 to 7<br><i>Loss if impact</i>                                                                                                                       | Ecological restoration potential/ha<br>Score from 0 to 6<br><i>Gain if biodiversity offset</i>                                                                |
|---------------------------------------------------------------|------------------------------------------------------------------------------------------------------------------------------------------------------------------------------------------|---------------------------------------------------------------------------------------------------------------------------------------------------------------|
| Permanent <b>grasslands</b>                                   | <b>7</b><br><i>In Isère, the wetlands in permanent grasslands are assumed to be those of higher quality, they thus score the maximum value of 7</i>                                      | <b>0</b><br><i>The ecological restoration of a permanent grassland is therefore worthless because the ecosystem is assumed to already be of high quality.</i> |
| Hedgerow                                                      | <b>7</b><br><i>In Isère, the wetlands in hedgerow are assumed to be those of higher quality, they thus score the maximum value of 7</i>                                                  | <b>0</b><br><i>The ecological restoration of a hedgerow is therefore worthless because the ecosystem is assumed to already be of high quality.</i>            |
| <b>3 or 4 grasslands</b> + 1 or 2 other land use              | <b>5</b><br><i>This crop rotation includes 3 to 4 grasslands, it scores a value of 5</i>                                                                                                 | <b>2</b><br><i>They thus score an ecological restoration potential of 7-5=2</i>                                                                               |
| <b>3 grasslands</b> and 2 SC* / 3 SC et <b>2 grasslands</b>   | <b>4</b><br><i>This crop rotation includes 2 to 3 grasslands, it scores a value of 4</i>                                                                                                 | <b>3</b><br><i>They thus score an ecological restoration potential of 7-4=3</i>                                                                               |
| <b>3 grasslands</b> and 2 WC** / 3 WC and <b>2 grasslands</b> | <b>4</b>                                                                                                                                                                                 | <b>3</b>                                                                                                                                                      |
| <b>2 grasslands</b> , 2 WC, 1 other                           | <b>3</b><br><i>This crop rotation includes 2 grasslands, it scores a value of 3</i>                                                                                                      | <b>4</b><br><i>They thus score an ecological restoration potential of 7-3=4</i>                                                                               |
| <b>2 grasslands</b> , 1 SC, 1 other                           | <b>3</b>                                                                                                                                                                                 | <b>4</b>                                                                                                                                                      |
| Poplar                                                        | <b>3</b><br><i>Poplar groves are considered to be parcels that still have many of the ecological functions of wetlands but with less biodiversity, they score the average value of 3</i> | <b>4</b><br><i>They thus score an ecological restoration potential of 7-3=4</i>                                                                               |

|                                   |                                                                                                                                                                                                                              |                                                                                              |
|-----------------------------------|------------------------------------------------------------------------------------------------------------------------------------------------------------------------------------------------------------------------------|----------------------------------------------------------------------------------------------|
| 3 or 4 WC with <b>1 grassland</b> | <b>2</b><br><i>This crop rotation includes 1 grassland, it scores a value of 2</i>                                                                                                                                           | <b>5</b><br><i>They thus score an ecological restoration potential of 7-2=5</i>              |
| 3 or 4 SC with <b>1 grassland</b> | <b>2</b>                                                                                                                                                                                                                     | <b>5</b>                                                                                     |
| Arboriculture                     | <b>2</b><br><i>Parcels in arboriculture often imply the use of pesticides, they are considered to be in rather poor ecological condition although they do not score the minimum value</i>                                    | <b>5</b><br><i>They thus score an ecological restoration potential of 7-2=5</i>              |
| SC monocropping                   | <b>1</b><br><i>Parcels with no grassland during a crop rotation are considered of lowest quality, however they still trigger an offsetting need because they have some wetland features; they score the minimum value...</i> | <b>6</b><br><i>... they thus have a high ecological restoration potential score of 7-1=6</i> |
| WC monocropping                   | <b>1</b>                                                                                                                                                                                                                     | <b>6</b>                                                                                     |
| 3 or 4 SC without grassland       | <b>1</b>                                                                                                                                                                                                                     | <b>6</b>                                                                                     |
| 3 or 4 WC without grassland       | <b>1</b>                                                                                                                                                                                                                     | <b>6</b>                                                                                     |
| 3 SC and 2 WC / 3 WC and 2 SC     | <b>1</b>                                                                                                                                                                                                                     | <b>6</b>                                                                                     |
| 2 WC, 2 SC, 1 other               | <b>1</b>                                                                                                                                                                                                                     | <b>6</b>                                                                                     |
| Market gardening;<br>horticulture | <b>1</b>                                                                                                                                                                                                                     | <b>6</b>                                                                                     |
| Permanent crop (orchard,<br>wine) | <b>1</b>                                                                                                                                                                                                                     | <b>6</b>                                                                                     |

\*Spring crops (SC), \*\*Winter crops (WC)

1.2 – Zone with less intensive agricultural practices, mostly livestock farming: Trièves-Matheysine, Chartreuse, Vercors, Grésivaudan > 1,000 m, Southern Grésivaudan > 1,000 m

| Agricultural practice                                         | Ecological score /ha<br>Score from 1 to 7<br><i>Loss if impact</i> | Ecological restoration potential/ha<br>Score from 0 to 6<br><i>Gain if biodiversity offset</i> |
|---------------------------------------------------------------|--------------------------------------------------------------------|------------------------------------------------------------------------------------------------|
| Permanent <b>grasslands</b>                                   | 7                                                                  | 0                                                                                              |
| Hedgerow                                                      | 7                                                                  | 0                                                                                              |
| <b>3 or 4 grasslands</b> + 1 or 2 other land use              | 6                                                                  | 1                                                                                              |
| <b>3 grasslands</b> and 2 SC* / 3 SC et <b>2 grasslands</b>   | 5                                                                  | 2                                                                                              |
| <b>3 grasslands</b> and 2 WC** / 3 WC and <b>2 grasslands</b> | 5                                                                  | 2                                                                                              |
| <b>2 grasslands</b> , 2 WC, 1 other                           | 4                                                                  | 3                                                                                              |
| <b>2 grasslands</b> , 1 SC, 1 other                           | 4                                                                  | 3                                                                                              |
| Poplar                                                        | 4                                                                  | 3                                                                                              |
| 3 or 4 WC with <b>1 grassland</b>                             | 3                                                                  | 4                                                                                              |
| 3 or 4 SC with <b>1 grassland</b>                             | 3                                                                  | 4                                                                                              |
| Arboriculture                                                 | 3                                                                  | 4                                                                                              |
| SC monocropping                                               | 1                                                                  | 6                                                                                              |
| WC monocropping                                               | 1                                                                  | 6                                                                                              |
| 3 or 4 SC without grassland                                   | 1                                                                  | 6                                                                                              |
| 3 or 4 WC without grassland                                   | 1                                                                  | 6                                                                                              |
| 3 SC and 2 WC / 3 WC and 2 SC                                 | 1                                                                  | 6                                                                                              |
| 2 WC, 2 SC, 1 other                                           | 1                                                                  | 6                                                                                              |
| Market gardening; horticulture                                | 1                                                                  | 6                                                                                              |
| Permanent crop (orchard, wine)                                | 1                                                                  | 6                                                                                              |
| Other agricultural practice                                   | 1                                                                  | 6                                                                                              |

\*Spring crops (SC), \*\*Winter crops (WC)
